# Supplementary material for: Association between Glycemic Management during Pregnancy and Postpartum Metabolic Health Outcomes among Women with Gestational Diabetes Mellitus
Source: Research Square preprint supplement (doi:10.21203/rs.3.rs-6639941/v1), 2025-08-05
Supplement: Supplementary file 1 [file ea35a8f5d37319a6570b55ae.docx]

**Table S1** Linear regression analysis of association between gestational glycemic control and postpartum metabolic outcomes

| Indicators | | N (Mean±s. d) | Model 1 | |  | Model 2 | |
| --- | --- | --- | --- | --- | --- | --- | --- |
| *β (95%CI)* | *P* |  | *β (95%CI)* | *P* |
| 1. FPG   (n=466) | Non-GDM, normal glycaemic control | 186 (4.83±0.48) | Ref. |  |  | Ref. |  |
| GDM, normal glycaemic control | 119 (4.98±0.54) | 0.15 (0.03, 0.28) | 0.015* |  | 0.03 (-0.13, 0.20) | 0.699 |
| GDM, abnormal glycaemic control | 68 (5.11±0.68) | 0.28 (0.13, 0.43) | <0.001* |  | 0.24 (0.05, 0.43) | 0.012* |
| Late-onset GDM | 93 (4.96±0.53) | 0.13 (0.00, 0.27) | 0.054 |  | 0.12 (-0.04, 0.28) | 0.15 |
| 1. FPG   (n=376) | Non-GDM, normal glycaemic control | 149 (4.63±0.60) | Ref. |  |  | Ref. |  |
| GDM, normal glycaemic control | 83 (4.74±0.68) | 0.10 (-0.06, 0.27) | 0.218 |  | -0.21 (-0.43, 0.01) | 0.054 |
| GDM, abnormal glycaemic control | 57 (4.88±0.62) | 0.25 (0.07, 0.44) | 0.008* |  | -0.01 (-0.26, 0.25) | 0.951 |
| Late-onset GDM | 87 (4.68±0.51) | 0.04 (-0.12, 0.20) | 0.612 |  | -0.13 (-0.40, 0.13) | 0.327 |
| SBP  (n=583) | Non-GDM, normal glycaemic control | 245 (107.44±9.83) | Ref. |  |  | Ref. |  |
| GDM, normal glycaemic control | 119 (108.48±12.24) | 1.04 (-1.45, 3.53) | 0.411 |  | 0.08 (-3.19, 3.35) | 0.963 |
| GDM, abnormal glycaemic control | 75 (109.93±13.63) | 2.50 (-0.44, 5.43) | 0.096 |  | 2.03 (-1.87, 5.94) | 0.307 |
| Late-onset GDM | 144 (108.77±11.59) | 1.34 (-1.00, 3.67) | 0.262 |  | 0.67 (-2.90, 4.24) | 0.712 |
| DBP  (n=583) | Non-GDM, normal glycaemic control | 245 (73.72±7.79) | Ref. |  |  | Ref. |  |
| GDM, normal glycaemic control | 119 (73.76±9.85) | 0.03 (-1.86, 1.92) | 0.974 |  | -0.18 (-2.64, 2.28) | 0.885 |
| GDM, abnormal glycaemic control | 75 (77.02±8.74) | 3.30 (1.06, 5.53) | 0.004* |  | 2.70 (-0.23, 5.64) | 0.071 |
| Late-onset GDM | 144 (73.73±8.84) | 0.01 (-1.77, 1.79) | 0.993 |  | -0.64 (-3.33, 2.04) | 0.638 |
| waist  (n=617) | Non-GDM, normal glycaemic control | 257 (71.26±21.72) | Ref. |  |  | Ref. |  |
| GDM, normal glycaemic control | 128 (71.43±25.18) | 0.18 (-4.61, 4.97) | 0.942 |  | -1.88 (-8.10, 4.35) | 0.554 |
| GDM, abnormal glycaemic control | 81 (74.12±22.87) | 2.87 (-2.77, 8.50) | 0.319 |  | 1.89 (-5.59, 9.37) | 0.62 |
| Late-onset GDM | 151 (73.12±21.32) | 1.86 (-2.68, 6.40) | 0.421 |  | 2.85 (-4.02, 9.72) | 0.415 |
| hip measurement  (n=617) | Non-GDM, normal glycaemic control | 257 (88.73±26.02) | Ref. |  |  | Ref. |  |
| GDM, normal glycaemic control | 128 (86.75±29.86) | -1.97 (-7.65, 3.70) | 0.495 |  | -4.15 (-11.71, 3.40) | 0.28 |
| GDM, abnormal glycaemic control | 81 (90.39±26.56) | 1.66 (-5.03, 8.35) | 0.626 |  | 0.94 (-8.14, 10.01) | 0.839 |
| Late-onset GDM | 151 (90.39±25.11) | 1.66 (-3.72, 7.04) | 0.544 |  | 2.52 (-5.81, 10.85) | 0.552 |
| TC  (n=376) | Non-GDM, normal glycaemic control | 149 (4.49±0.79) | Ref. |  |  | Ref. |  |
| GDM, normal glycaemic control | 83 (4.31±0.80) | -0.18 (-0.39, 0.04) | 0.112 |  | -0.16 (-0.43, 0.11) | 0.245 |
| GDM, abnormal glycaemic control | 57 (4.77±0.95) | 0.28 (0.03, 0.53) | 0.026* |  | 0.37 (0.05, 0.69) | 0.023* |
| Late-onset GDM | 87 (4.35±0.74) | -0.14 (-0.35, 0.08) | 0.212 |  | -0.11 (-0.45, 0.22) | 0.504 |
| TG  (n=376) | Non-GDM, normal glycaemic control | 149 (1.08±0.62) | Ref. |  |  | Ref. |  |
| GDM, normal glycaemic control | 83 (1.22±0.67) | 0.15 (-2.31, 2.60) | 0.906 |  | 0.29 (-3.83, 4.41) | 0.889 |
| GDM, abnormal glycaemic control | 57 (4.71±2.42) | 3.63 (0.84, 6.42) | 0.011* |  | 5.42 (0.57, 10.26) | 0.029* |
| Late-onset GDM | 87 (1.07±0.62) | 0.00 (-2.42, 2.41) | 0.997 |  | 1.14 (-3.94, 6.21) | 0.66 |
| HDL  (n=376) | Non-GDM, normal glycaemic control | 149 (1.39±0.25) | Ref. |  |  | Ref. |  |
| GDM, normal glycaemic control | 83 (1.36±0.22) | -0.02 (-0.09, 0.05) | 0.515 |  | 0.06 (-0.03, 0.14) | 0.18 |
| GDM, abnormal glycaemic control | 57 (1.35±0.25) | -0.04 (-0.11, 0.04) | 0.344 |  | 0.04 (-0.06, 0.14) | 0.411 |
| Late-onset GDM | 87 (1.39±0.26) | 0.01 (-0.06, 0.07) | 0.859 |  | 0.03 (-0.08, 0.13) | 0.626 |
| LDL  (n=376) | Non-GDM, normal glycaemic control | 149 (2.72±0.66) | Ref. |  |  | Ref. |  |
| GDM, normal glycaemic control | 83 (2.58±0.72) | -0.14 (-0.32, 0.05) | 0.145 |  | -0.14 (-0.37, 0.09) | 0.226 |
| GDM, abnormal glycaemic control | 57 (2.87±0.70) | 0.16 (-0.05, 0.37) | 0.136 |  | 0.23 (-0.04, 0.50) | 0.09 |
| Late-onset GDM | 87 (2.60±0.66) | -0.11 (-0.29, 0.07) | 0.224 |  | -0.11 (-0.39, 0.17) | 0.438 |
| ApoA  (n=376) | Non-GDM, normal glycaemic control | 149 (1.09±0.22) | Ref. |  |  | Ref. |  |
| GDM, normal glycaemic control | 83 (1.06±0.24) | -0.03 (-0.09, 0.03) | 0.272 |  | 0.00 (-0.08, 0.08) | 0.996 |
| GDM, abnormal glycaemic control | 57 (1.09±0.23) | 0.00 (-0.07, 0.06) | 0.907 |  | 0.02 (-0.07, 0.11) | 0.7 |
| Late-onset GDM | 87 (1.07±0.21) | -0.02 (-0.08, 0.04) | 0.425 |  | 0.00 (-0.09, 0.10) | 0.974 |
| ApoB  (n=376) | Non-GDM, normal glycaemic control | 149 (0.77±0.32) | Ref. |  |  | Ref. |  |
| GDM, normal glycaemic control | 83 (0.73±0.20) | -0.04 (-0.11, 0.03) | 0.246 |  | -0.02 (-0.08, 0.04) | 0.567 |
| GDM, abnormal glycaemic control | 57 (0.80±0.20) | 0.03 (-0.05, 0.11) | 0.426 |  | 0.06 (-0.02, 0.13) | 0.119 |
| Late-onset GDM | 87 (0.73±0.18) | -0.04 (-0.10, 0.03) | 0.286 |  | 0.02 (-0.06, 0.10) | 0.632 |

Abbreviation: 42-FPG, fasting blood glucose at 42 days postpartum; 1-FPG, fasting blood glucose at 1 year postpartum; SBP, systolic blood pressure; DBP, diastolic blood pressure; TC, total cholesterol; TG, triglyceride; HDL, high density lipoprotein; LDL, low density lipoprotein; ApoA, apolipoprotein A; ApoB, apolipoprotein B, Lp(a), lipoprotein a; TyG, triglyceride glucose index; SiMS, simple method for quantifying metabolic syndrome. (All biochemicals measured 1 year postpartum except 42-FPG).

Model 1: unadjusted model; Model 2: adjusted for maternal age, pre-pregnancy BMI, literacy, marital status, ethnicity, parity, family history of diabetes mellitus, family history of cardiovascular disease, smoking (pre-pregnancy and 1 year postpartum), drinking (pre-pregnancy and 1 year postpartum), physical activity and red meat intake at 42 days and 1 year postpartum.

*: P < 0.05.

**Table S2** Logistic regression analysis of association between gestational glycemic control and postpartum metabolic outcomes

| Indicators | N (%) | | Model 1 | |  | Model 2 | |
| --- | --- | --- | --- | --- | --- | --- | --- |
| *OR (95%CI)* | *P* |  | *OR (95%CI)* | *P* |
| postpartum glucose (n=553) | Abnormality (n=52) | Normality (n=501) |  |  |  |  |  |
| Non-GDM, normal glycaemic control | 9 (4.4) | 196 (95.6) | Ref. |  |  | Ref. |  |
| GDM, normal glycaemic control | 17 (11.3) | 133 (88.7) | 2.78 (1.21, 6.43) | 0.017* |  | 2.69 (0.84, 8.59) | 0.096 |
| GDM, abnormal glycaemic control | 17 (17.2) | 82 (82.8) | 4.52 (1.93, 10.54) | <0.001* |  | 5.22 (1.66, 16.38) | 0.005* |
| Late-onset GDM | 9 (9.1) | 90 (90.9) | 2.18 (0.84, 5.67) | 0.111 |  | 2.12 (0.52, 8.71) | 0.298 |
| TC (n=377) | L-TC (n=60) | Normality (n=317) |  |  |  |  |  |
| Non-GDM, normal glycaemic control | 25 (16.7) | 125 (83.3) | Ref. |  |  | Ref. |  |
| GDM, normal glycaemic control | 10 (12) | 73 (88) | 0.69 (0.31, 1.51) | 0.347 |  | 0.65 (0.22, 1.89) | 0.426 |
| GDM, abnormal glycaemic control | 14 (24.6) | 43 (75.4) | 1.63 (0.78, 3.41) | 0.197 |  | 1.98 (0.68, 5.76) | 0.213 |
| Late-onset GDM | 11 (12.6) | 76 (87.4) | 0.72 (0.34, 1.55) | 0.407 |  | 0.69 (0.18, 2.72) | 0.597 |
| TG (n=377) | H-TG (n=56) | Normality (n=321) |  |  |  |  |  |
| Non-GDM, normal glycaemic control | 18 (12) | 132 (88) | Ref. |  |  | Ref. |  |
| GDM, normal glycaemic control | 15 (18.1) | 68 (81.9) | 1.62 (0.77, 3.41) | 0.206 |  | 1.44 (0.62, 3.38) | 0.398 |
| GDM, abnormal glycaemic control | 15 (26.3) | 42 (73.7) | 2.62 (1.22, 5.65) | 0.014* |  | 2.43 (1.01, 5.85) | 0.048* |
| Late-onset GDM | 8 (9.2) | 79 (90.8) | 0.74 (0.31, 1.79) | 0.507 |  | 1.24 (0.44, 3.53) | 0.688 |
| HDL (n=377) | L-HDL (n=26) | Normality (n=351) |  |  |  |  |  |
| Non-GDM, normal glycaemic control | 8 (5.3) | 142 (94.7) | Ref. |  |  | Ref. |  |
| GDM, normal glycaemic control | 8 (9.6) | 75 (90.4) | 1.89 (0.68, 5.25) | 0.22 |  | 1.33 (0.35, 5.06) | 0.679 |
| GDM, abnormal glycaemic control | 4 (7) | 53 (93) | 1.34 (0.39, 4.63) | 0.644 |  | 0.90 (0.18, 4.37) | 0.891 |
| Late-onset GDM | 6 (6.9) | 81 (93.1) | 1.32 (0.44, 3.92) | 0.624 |  | 1.09 (0.18, 6.65) | 0.927 |
| LDL (n=377) | H-LDL (n=52) | Normality (n=325) |  |  |  |  |  |
| Non-GDM, normal glycaemic control | 19 (12.7) | 131 (87.3) | Ref. |  |  | Ref. |  |
| GDM, normal glycaemic control | 11 (13.3) | 72 (86.7) | 1.05 (0.48, 2.34) | 0.898 |  | 1.07 (0.33, 3.50) | 0.916 |
| GDM, abnormal glycaemic control | 11 (19.3) | 46 (80.7) | 1.65 (0.73, 3.73) | 0.229 |  | 2.87 (0.86, 9.54) | 0.085 |
| Late-onset GDM | 11 (12.6) | 76 (87.4) | 1.00 (0.45, 2.21) | 0.996 |  | 1.07 (0.24, 4.65) | 0.934 |

Abbreviation: H-TC, high total cholesterol; H-TG, high triglyceride; L-HDL, low-high density lipoprotein; H-LDL, high-low density lipoprotein; H-SBP, high systolic blood pressure; H-DBP, high diastolic blood pressure; TyG, triglyceride glucose index; SiMS, simple method for quantifying metabolic syndrome. (Post-partum blood glucose including 42 days and 1 year post-partum).

Model 1: unadjusted model; Model 2: adjusted for maternal age, pre-pregnancy BMI, literacy, marital status, ethnicity, parity, family history of diabetes mellitus, family history of cardiovascular disease, smoking (pre-pregnancy and 1 year postpartum), drinking (pre-pregnancy and 1 year postpartum), physical activity and red meat intake at 42 days and 1 year postpartum.

*: P < 0.05.
